# Supplementary material for: Renibacterium salmoninarum—The Causative Agent of Bacterial Kidney Disease in Salmonid Fish
Source: PubMed Central journal article supplement (PMC7602803; doi:10.3390/pathogens9100845), 2020-10-15
Supplement: pathogens-09-00845-s001.pdf [file pathogens-09-00845-s001.pdf]

**Supplementary Table 1: Geographical distribution for *R. salmoninarum***

| Place of isolation                                                                                   | Affected species                                                                                                                                                                                                                                                                                                                                                                                                         | Reference |
|------------------------------------------------------------------------------------------------------|--------------------------------------------------------------------------------------------------------------------------------------------------------------------------------------------------------------------------------------------------------------------------------------------------------------------------------------------------------------------------------------------------------------------------|-----------|
| Pacific Ocean                                                                                        | Chinook trout ( <i>Oncorhynchus tshawytscha</i> ), coho salmon ( <i>O. Kisutch</i> ), chum salmon ( <i>O. Keta</i> ), pink salmon ( <i>O. Gorbuscha</i> ), socheye salmon ( <i>O. Nerka</i> ), <i>Salmo gairdneri</i> , <i>S. clarkia</i>                                                                                                                                                                                | [1,2]     |
| Alaska                                                                                               | Anadromous Pacific salmon ( <i>Oncorhynchus spp.</i> ), non-anadromous Dolly Varden ( <i>Salvelinus malma</i> ), Arctic char ( <i>S. alpinus</i> ), Arctic grayling ( <i>Thymallus arcticus</i> ), brook trout ( <i>S. fontinalis</i> ), cutthroat trout ( <i>O. clarki</i> ), lake trout ( <i>S. namaycush</i> ), rainbow trout ( <i>O. mykiss</i> ), steelhead (anadromous rainbow trout)                              | [3]       |
| Ontario (Canada)                                                                                     | Rainbow trout ( <i>O. mykiss</i> ), lake trout ( <i>Salvelinus namaycush</i> ), brook trout ( <i>S. fontinalis</i> ), brown trout ( <i>Salmo trutta</i> ), Atlantic salmon ( <i>Salmo salar</i> ), coho salmon ( <i>O. kisutch</i> ), chinook salmon ( <i>O. tshawytscha</i> ), walleye ( <i>Stizostedion vitreum</i> ), and lake whitefish ( <i>Coregonus clupeaformis</i> ), Arctic char ( <i>Salvelinus alpinus</i> ) | [4]       |
| Germany                                                                                              | <i>Hucho hucho</i> , <i>Salvelinus alpinus</i>                                                                                                                                                                                                                                                                                                                                                                           | [5]       |
| Michigan (Michigan river), Oregon (Columbia and Snake river), Washington and Wyoming (North America) | Chinook salmon ( <i>O. tshawytscha</i> ), brook trout ( <i>Salvelinus fontinalis</i> ), brown trout ( <i>Salmo trutta</i> ), and rainbow trout ( <i>Salmo gairdneri</i> )                                                                                                                                                                                                                                                | [6–8]     |
| Loon Lake (British Colombia)                                                                         | Rainbow trout ( <i>O. mykiss</i> )                                                                                                                                                                                                                                                                                                                                                                                       | [9]       |
| Poland                                                                                               | Brook trout ( <i>Salvelinus fontinalis</i> )                                                                                                                                                                                                                                                                                                                                                                             | [5]       |

## References:

1. Buller, N.B. *Bacteria and Fungi from Fish and other Aquatic Animals: a practical identification manual*; 2nd ed.; CABI Publishing: Wallingford, United-Kingdom, 2014; p. 904.
2. Banner, C.R.; Long, J.J.; Fryer, J.L.; Rohovec, J.S. Occurrence of salmonid fish infected with *Renibacterium salmoninarum* in the Pacific Ocean. *J. Fish Dis.* **1986**, *9*, 273–275.
3. Meyers, T.R.; Korn, D.; Glass, K.; Burton, T.; Short, S.; Lipson, K.; Starkey, N. Retrospective analysis of antigen prevalences of *Renibacterium salmoninarum* (Rs) detected by enzyme-linked immunosorbent assay in Alaskan Pacific salmon and trout from 1988 to 2000 and management of Rs in hatchery Chinook and coho salmon. *J. Aquat. Anim. Health.* **2003**, *15*, 101–110, doi:10.1577/H02-022.
4. Bruneau, Nathalie & Thorburn, M. Occurrence of *aeromonas salmonicida*, *renibacterium salmoninarum*, and infectious pancreatic necrosis virus in Ontario salmonid populations. *J. Aquat. Anim. Health.* **1999**, *11*, 350–357, doi:10.1577/1548-8667(1999)011<0350:OOASRS>2.0.CO;2.
5. Pfeil-Putzien, C.; Hoffmann, R.; Popp, W. Preliminary report on the occurrence of bacterial kidney disease in Germany. *Bull. Eur. Assoc. Fish Pathol.* **1985**, *5*, 30–31.
6. Holey, M.E.; Elliott, R.F.; Marcquenski, S. V; Hnath, J.G.; Smith, K.D. Chinook Salmon epizootics in Lake Michigan: Possible contributing factors and management implications. *J. Aquat. Anim. Health.* **1998**, *10*, 202–210.
7. Vanderkooi, S.P.; Maule, A.G. Prevalence of *Renibacterium salmoninarum* in juvenile spring Chinook salmon at Columbia and snake river hatcheries, 1993 – 1996. *J. Aquat. Anim. Health.* **1999**, *11*, 162–169.
8. Mitchum, D.L.; Sherman, L.E.; Baxter, G.T. Bacterial kidney disease in feral populations of brook trout (*Salvelinus fontinalis*), brown trout (*Salmo trutta*), and rainbow trout (*Salmo gairdneri*). *J. Fish. Board Canada.* **1979**, *36*, 1370–1376.
9. Evelyn, T.P.T.; Hoskins, G.E.; Bell, G.R. First record of bacterial kidney disease in an apparently wild salmonid in British Columbia. *J. Fish. Board Canada.* **1973**, *30*, 1578–1580.
